# Supplementary figures and images for: Asymmetric rectified electric fields: nonlinearities and equivalent circuits
Source: Royal Society of Chemistry journal article supplement (doi:10.1039/d3sm01306e), 2023-12-19

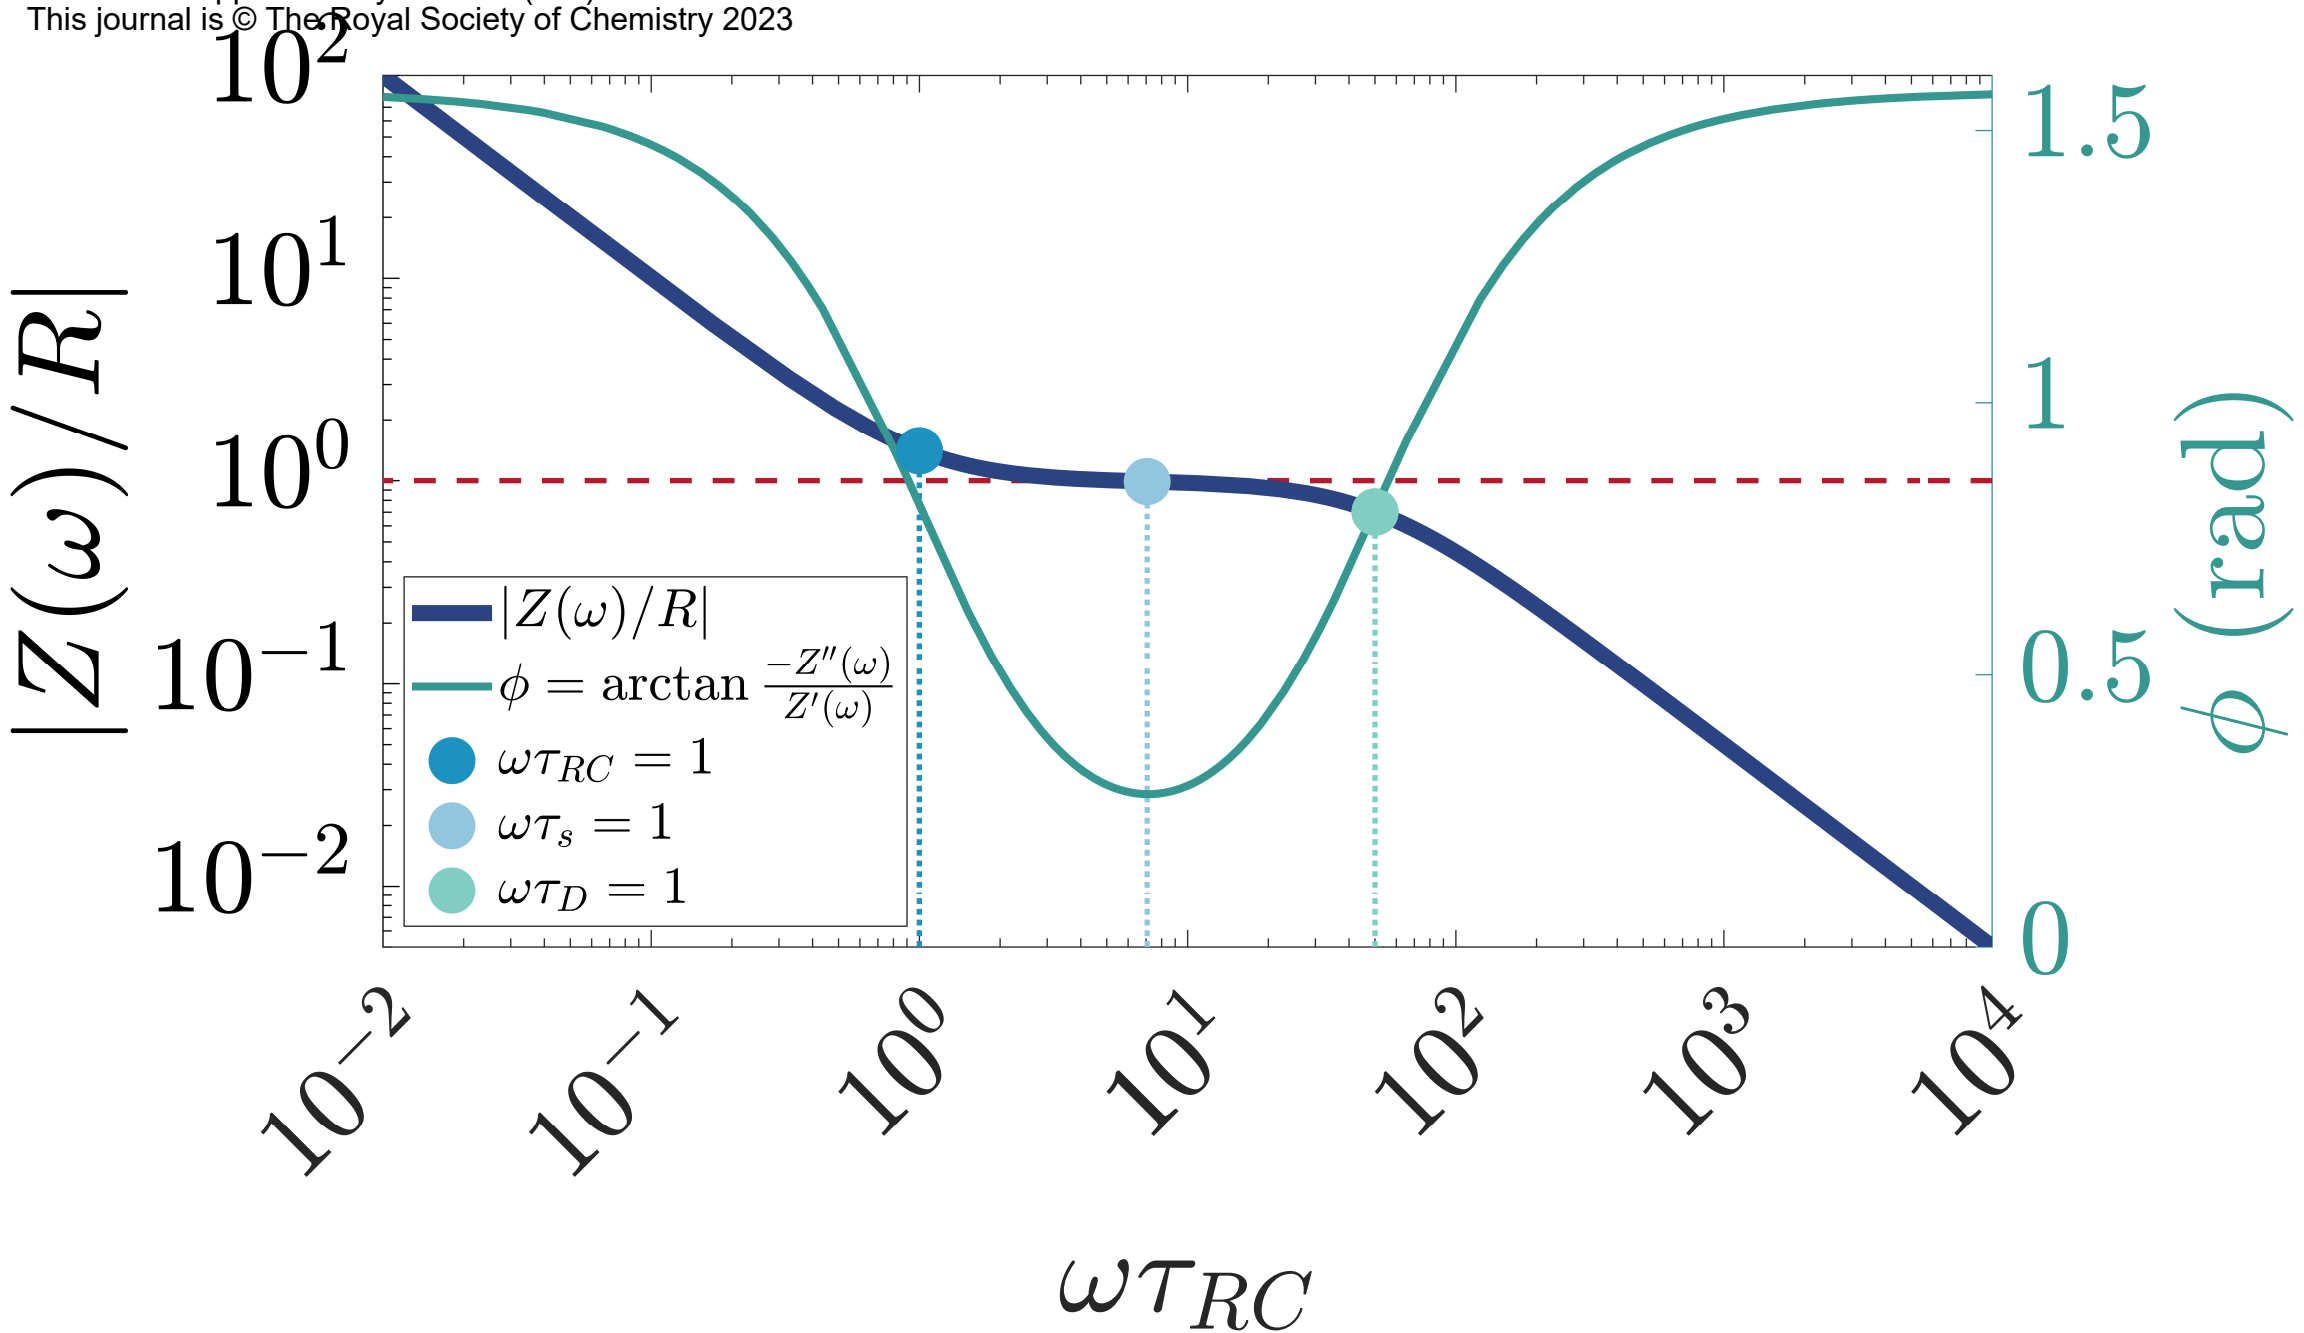

Supplement: d3sm01306e1.pdf [file d3sm01306e1.pdf]
